# Supplementary material
Source: Elsevier journal article supplement (https://www.sciencedirect.com/science/article/pii/S030089322030539X)

# Safety of transvenous lead removal in adult congenital heart disease: a national perspective

## Table 1 of the supplementary data

International Classification of Diseases, Ninth Revision (ICD-9) codes for adult congenital heart disease

| ICD-9 code   | ICD-9 description                            | Complex? |
|--------------|----------------------------------------------|----------|
| <b>745.0</b> | Common truncus                               | Yes      |
| <b>745.1</b> | Transposition complex                        |          |
| 745.10       | Complete transposition of great vessels      | Yes      |
| 745.11       | Double outlet right ventricle                | Yes      |
| 745.12       | Corrected transposition of great vessels     | Yes      |
| 745.19       | Other transposition of the great vessels     | Yes      |
| <b>745.2</b> | Tetralogy of Fallot                          | Yes      |
| <b>745.3</b> | Common ventricle                             | Yes      |
| <b>745.4</b> | Ventricular septal defect                    | No       |
| <b>745.5</b> | Ostium secundum type atrial septal defect    | No       |
| <b>745.6</b> | Endocardial cushion defect                   |          |
| 745.60       | Endocardial cushion defect, unspecified type | Yes      |
| 745.61       | Ostium primum defect                         | Yes      |

|              |                                              |     |
|--------------|----------------------------------------------|-----|
| 745.69       | Other endocardial cushion defect             | Yes |
| <b>745.7</b> | Cor biloculare                               | Yes |
| <b>745.8</b> | Other bulbus cordis anomaly or septal defect | No  |
| <b>745.9</b> | Unspecified defect of septal closure         | No  |
| <b>746.0</b> | Anomalies of pulmonary valve                 |     |
| 746.00       | Pulmonary valve anomaly, unspecified         | Yes |
| 746.01       | Pulmonary atresia                            | Yes |
| 746.02       | Pulmonary stenosis                           | Yes |
| 746.09       | Pulmonary valve anomaly, other               | Yes |
| <b>746.1</b> | Tricuspid atresia and stenosis               | Yes |
| <b>746.2</b> | Ebstein's anomaly                            | Yes |
| <b>746.3</b> | Congenital stenosis of aortic valve          | No  |
| <b>746.4</b> | Congenital insufficiency of aortic valve     | No  |
| <b>746.5</b> | Congenital mitral stenosis                   | No  |
| <b>746.6</b> | Congenital mitral insufficiency              | No  |
| <b>746.7</b> | Hypoplastic left heart syndrome              | Yes |
| <b>746.8</b> | Other unspecified anomalies of the heart     |     |

|              |                                       |              |
|--------------|---------------------------------------|--------------|
| 746.81       | Subaortic stenosis                    | Yes          |
| 746.82       | Cor triatriatum                       | Yes          |
| 746.83       | Infundibular pulmonic stenosis        | Yes          |
| 746.84       | Obstructive anomalies of heart, NEC   | Yes          |
| 746.85       | Coronary artery anomaly               | No           |
| 746.86       | Congenital heart block                | No           |
| 746.87       | Malposition of heart and cardiac apex | Unclassified |
| 746.89       | Other congenital anomalies of heart   | Unclassified |
| <b>746.9</b> | Other congenital anomalies of heart   | Unclassified |
| <b>747.0</b> | Patent ductus arteriosus              | Yes          |
| <b>747.1</b> | Coarctation of aorta                  |              |
| 747.10       | Coarctation of aorta                  | Yes          |
| 747.11       | Interruption of aortic arch           | Yes          |
| <b>747.2</b> | Anomalies of aorta                    |              |
| 747.20       | Anomaly of aorta, unspecified         | Yes          |
| 747.21       | Anomalies of aortic arch              | Yes          |
| 747.22       | Atresia and stenosis of aorta         | Yes          |

|              |                                               |              |
|--------------|-----------------------------------------------|--------------|
| 747.29       | Other congenital anomalies of the aorta       | Yes          |
| <b>747.3</b> | Anomalies of pulmonary artery                 | Yes          |
| <b>747.4</b> | Anomaly of great veins                        |              |
| 747.40       | Anomaly of great veins, unspecified           | Yes          |
| 747.41       | Total anomalous pulmonary venous connection   | Yes          |
| 747.42       | Partial anomalous pulmonary venous connection | Yes          |
| 747.49       | Other anomalies of great veins                | Yes          |
| 747.9        | Unspecified anomaly of circulatory system     | Unclassified |

ICD, International Classification of Diseases.

Adapted from Opatowsky AR, Siddiqi OK, Webb GD. Trends in hospitalizations for adults with congenital heart disease in the U.S. *J Am Coll Cardiol*. 2009;54:460–467.

These classifications are based on the 32nd Bethesda Conference document and other published reports. Simple diagnoses with coexisting complex diagnoses or pulmonary hypertension were classified as complex.

Values in bold indicate 1 large group (eg, 745.1), followed, in nonbold, by subgroups (eg, 745.11, 745.12).

**Table 2 of the supplementary data**

Procedural complications by ICD-9 code

| Procedural complication                  | ICD-9 code                                                              |
|------------------------------------------|-------------------------------------------------------------------------|
| <i>Vascular injury</i>                   |                                                                         |
| Injury to blood vessels                  | 900X-904X                                                               |
| Accidental puncture                      | 998.2                                                                   |
| Arteriovenous fistula                    | 447.0                                                                   |
| Injury to the retroperitoneum            | 868.04                                                                  |
| Vascular complications requiring surgery | 39.31, 39.41, 39.49, 39.52, 39.53, 39.56,<br>39.57, 39.58, 39.59, 39.79 |
| Other vascular complications             | 999.2, 997.7                                                            |
| <i>Hemorrhage</i>                        | 998.11, 998.12                                                          |
| <i>Hemorrhage requiring transfusion</i>  | 998.11 or 998.12 AND 99.0 or V58.2                                      |
| <i>Pericardial complications</i>         |                                                                         |
| Hemopericardium                          | 423.0                                                                   |
| Cardiac tamponade                        | 423.3                                                                   |

|                                                            |                                                                     |
|------------------------------------------------------------|---------------------------------------------------------------------|
| Pericardiocentesis                                         | 37.0                                                                |
| Pericardiotomy                                             | 37.12                                                               |
| <i>Pneumothorax or hemothorax</i>                          | 512.1, 511.8, 511.89, 860.2                                         |
| <i>Pneumothorax or hemothorax requiring chest tube</i>     | 512.1, 511.8, 511.89, or 860.2 AND 34.04,<br>34.05, 34.06, or 34.09 |
| <i>Iatrogenic cerebrovascular infarction or hemorrhage</i> | 997.02                                                              |
| <i>Acute renal failure requiring new hemodialysis</i>      | 584X AND 39.95 AND NOT V45.1                                        |
| <i>Requiring repair of heart and pericardium</i>           | 37.4X                                                               |

ICD, International Classification of Diseases.

**Table 3 of the supplementary data**

Hierarchical regression modeling of the risk of in-hospital mortality and complications related to transvenous lead removal in patients with and without congenital heart disease in the total study population

|                  | Mortality       |           |      | Any complication |           |        |
|------------------|-----------------|-----------|------|------------------|-----------|--------|
|                  | OR              | 95%CI     | P    | OR               | 95%CI     | P      |
| <i>Model 1</i>   |                 |           |      |                  |           |        |
| No CHD           | 1.0 (reference) |           |      | 1.0 (reference)  |           |        |
| Simple CHD       | 0.82            | 0.42-1.60 | .556 | 1.71             | 1.30-2.25 | < .001 |
| Complex CHD      | 1.03            | 0.38-2.82 | .951 | 2.11             | 1.38-3.23 | .001   |
| Unclassified CHD | 1.11            | 0.41-3.04 | .838 | 1.02             | 0.57-1.83 | .956   |
| Any CHD          | 0.92            | 0.56-1.50 | .739 | 1.66             | 1.33-2.06 | < .001 |
| <i>Model 2</i>   |                 |           |      |                  |           |        |
| No CHD           | 1.0 (reference) |           |      | 1.0 (reference)  |           |        |
| Simple CHD       | 0.91            | 0.46-1.78 | .773 | 1.54             | 1.16-2.05 | .003   |
| Complex CHD      | 1.13            | 0.41-3.15 | .815 | 2.11             | 1.37-3.25 | .001   |
| Unclassified CHD | 1.59            | 0.57-4.44 | .374 | 1.01             | 0.55-1.85 | .986   |

|                  |                 |           |      |                 |           |        |
|------------------|-----------------|-----------|------|-----------------|-----------|--------|
| Any CHD          | 1.06            | 0.64-1.75 | .816 | 1.56            | 1.24-1.95 | < .001 |
| <i>Model 3</i>   |                 |           |      |                 |           |        |
| No CHD           | 1.0 (reference) |           |      | 1.0 (reference) |           |        |
| Simple CHD       | 1.03            | 0.52-2.02 | .940 | 1.52            | 1.14-2.03 | .004   |
| Complex CHD      | 1.24            | 0.44-3.47 | .680 | 2.09            | 1.35-3.22 | .005   |
| Unclassified CHD | 1.86            | 0.67-5.22 | .235 | 0.99            | 0.54-1.83 | .978   |
| Any CHD          | 1.20            | 0.72-2.00 | .477 | 1.54            | 1.23-1.93 | < .001 |

95%CI, 95% confidence interval; CHD, congenital heart disease; OR, odds ratio.

Model 1: unadjusted model.

Model 2: adjusted for age, sex, household income, primary payer, Charlson/Deyo Comorbidity Index, admission type, hospital bed size, hospital region, hospital location, hospital teaching status, hospital volume, and period.

Model 3: adjusted for model 2 and device infection.

Any CHD and the 3 types of CHD were analyzed in 2 separate regression processes with no CHD as the reference.



Figure 1 of the supplementary data

Absolute standardized differences in covariates between patients with and without congenital heart disease, before and after propensity score matching. An absolute standardized difference < 0.1 indicates adequate matching.

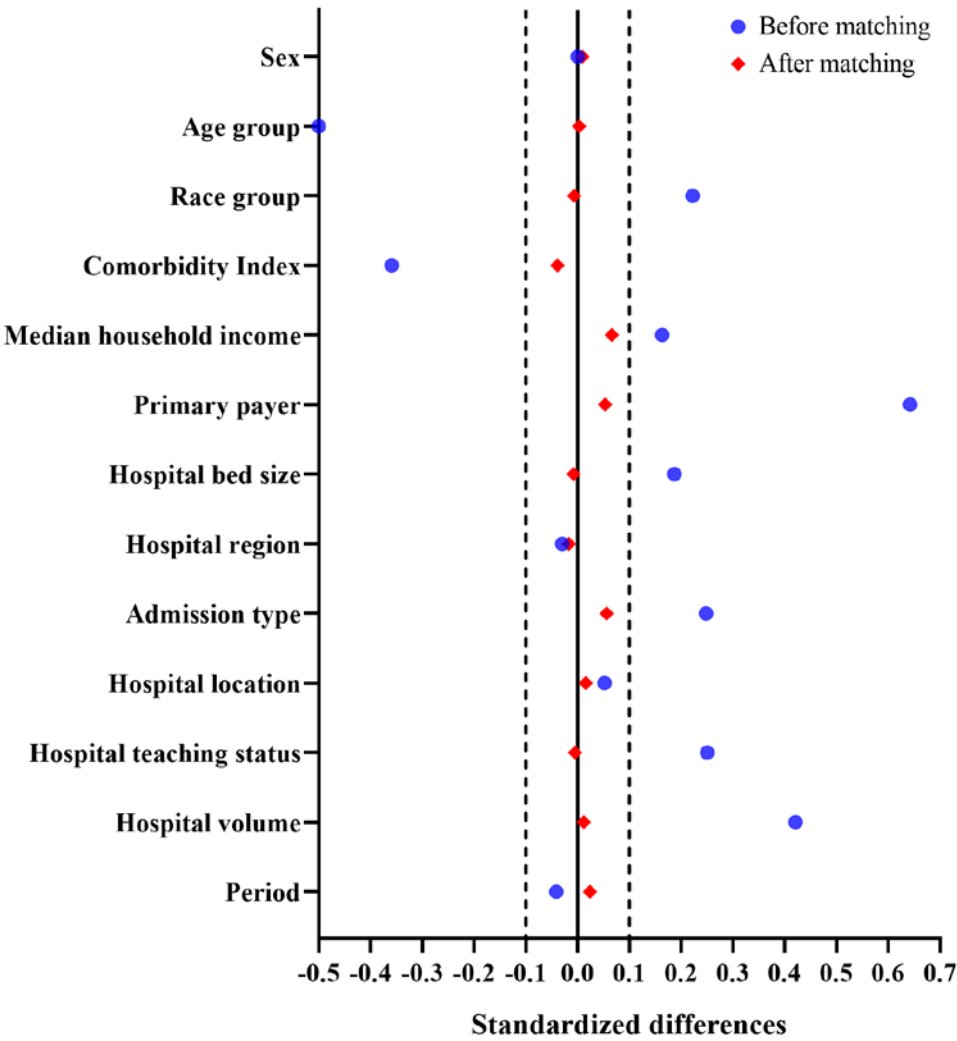

Supplement: mmc1 [file S030089322030539X:mmc1.pdf]
